# Supplementary material
Source: PubMed Central journal article supplement (PMC3408964)
Supplement: NIHMS394237-supplement-Supplementary_data.pdf [file NIHMS394237-supplement-Supplementary_data.pdf]

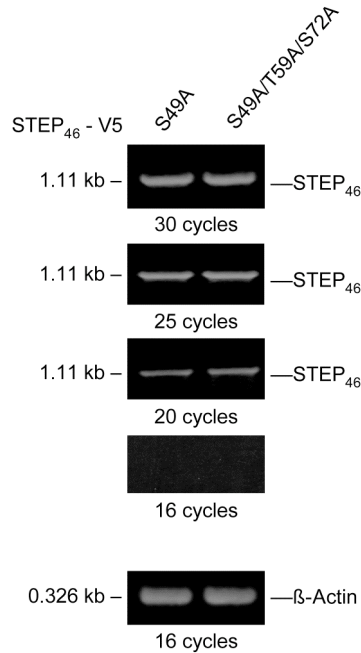

**S1.** Loss of expression of STEP<sub>46</sub> S49A/T59A/S72A is not regulated at the transcriptional level. STEP<sub>46</sub> S49A or its mutant STEP<sub>46</sub> S49A/T59A/S72A was transfected in HeLa cells. Total RNA extracted from HeLa cells was used for cDNA synthesis. The expression of STEP<sub>46</sub> S49A and STEP<sub>46</sub> S49A/T59A/S72A were determined by PCR amplification (16, 20, 25 and 30 cycles) using specific forward and reverse primers as described in the Experimental Procedures. The expression of house keeping gene β-actin mRNA was used as an internal control. PCR products from each sample were analyzed by agarose gel electrophoresis. The data shown are representative results of three experiments.
